# Supplementary material for: Infection of ectocervical tissue and universal targeting of T-cells mediated by primary non-macrophage-tropic and highly macrophage-tropic HIV-1 R5 envelopes
Source: PubMed Central journal article supplement (PMC4459458; doi:10.1186/s12977-015-0176-2), 2015-06-09

# Figure S2

## A Emigrant Cells: PHA/IL-2 Stimulated -- T-Cell Positive Selection

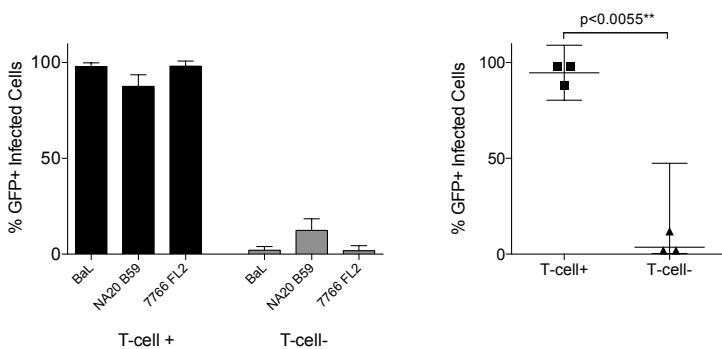

## B Emigrant Cells: PHA/IL-2 Stimulated -- Monocyte Negative Selection

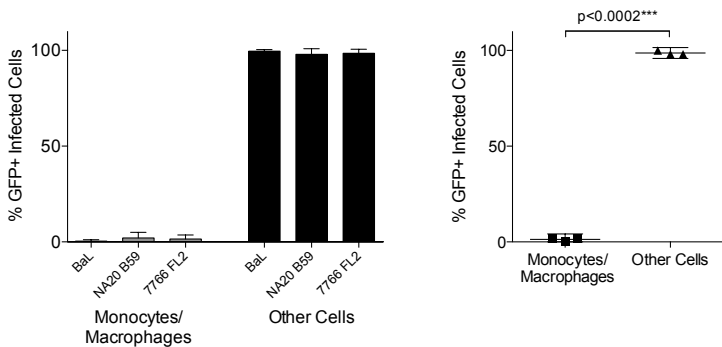

Supplement: 12977_2015_176_MOESM2_ESM.pdf [file 12977_2015_176_MOESM2_ESM.pdf]
